# Supplementary material
Source: PubMed Central journal article supplement (PMC6395934)
Supplement: AAC.02004-18-s0001.pdf [file AAC.02004-18-s0001.pdf]

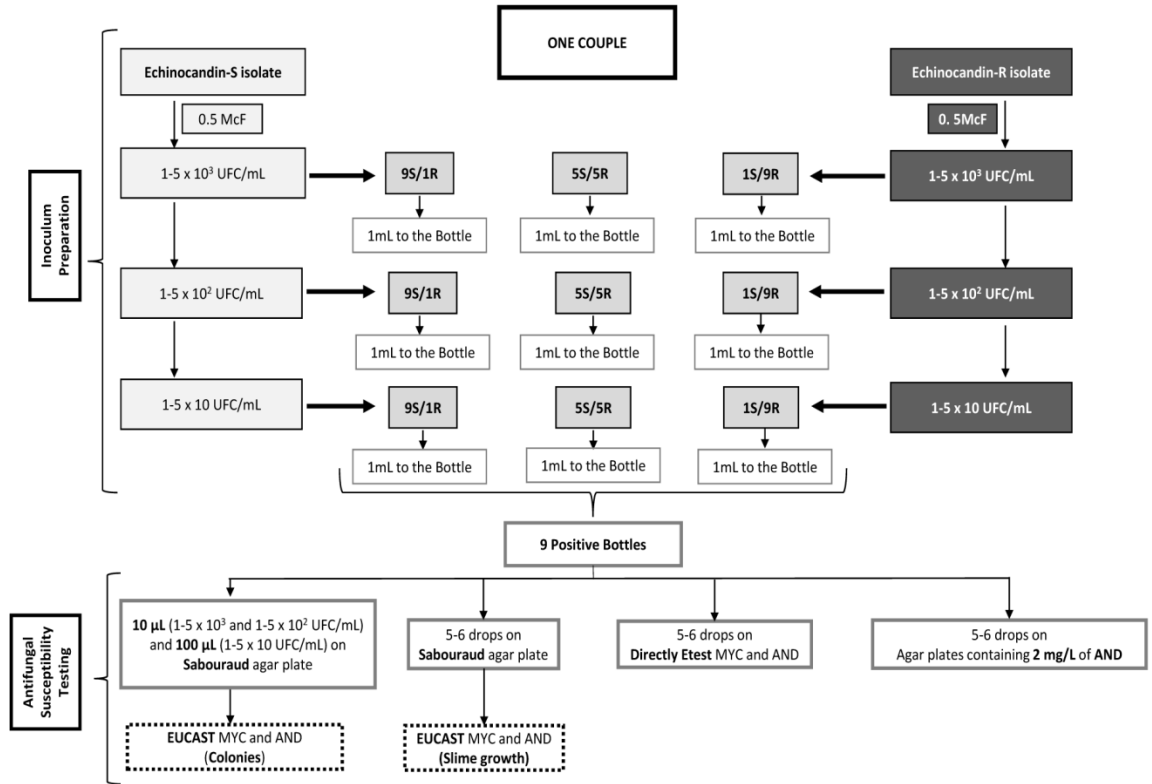

**Figure S1.** Summary of the experimental conditions used in one susceptible and resistant isolate pair for the preparation of inocula and various proportions, including positive bottles.

S = susceptible; R = resistant; McF = MacFarland; MYC = micafungin; AND = anidulafungin.

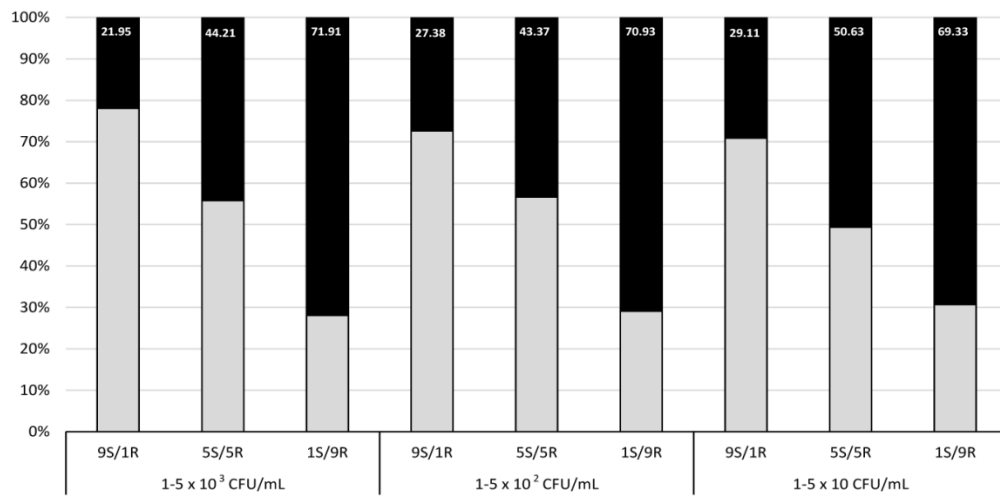

**Figure S2.** Percentage of echinocandin-susceptible / -resistant colonies for all pairs, distributed by proportion of the inoculum.

S = echinocandin-susceptible colonies; R = echinocandin-resistant colonies; black bars = percentage of resistance; grey bars = percentage of susceptibility.
